# Supplementary material for: DES-Based Biocatalysis as a Green Alternative for the l-menthyl Ester Production Based on l-menthol Acylation
Source: MDPI journal article supplement (doi:10.3390/molecules27165273), 2022-08-18
Supplement: s1 [file s1]

## Supplementary

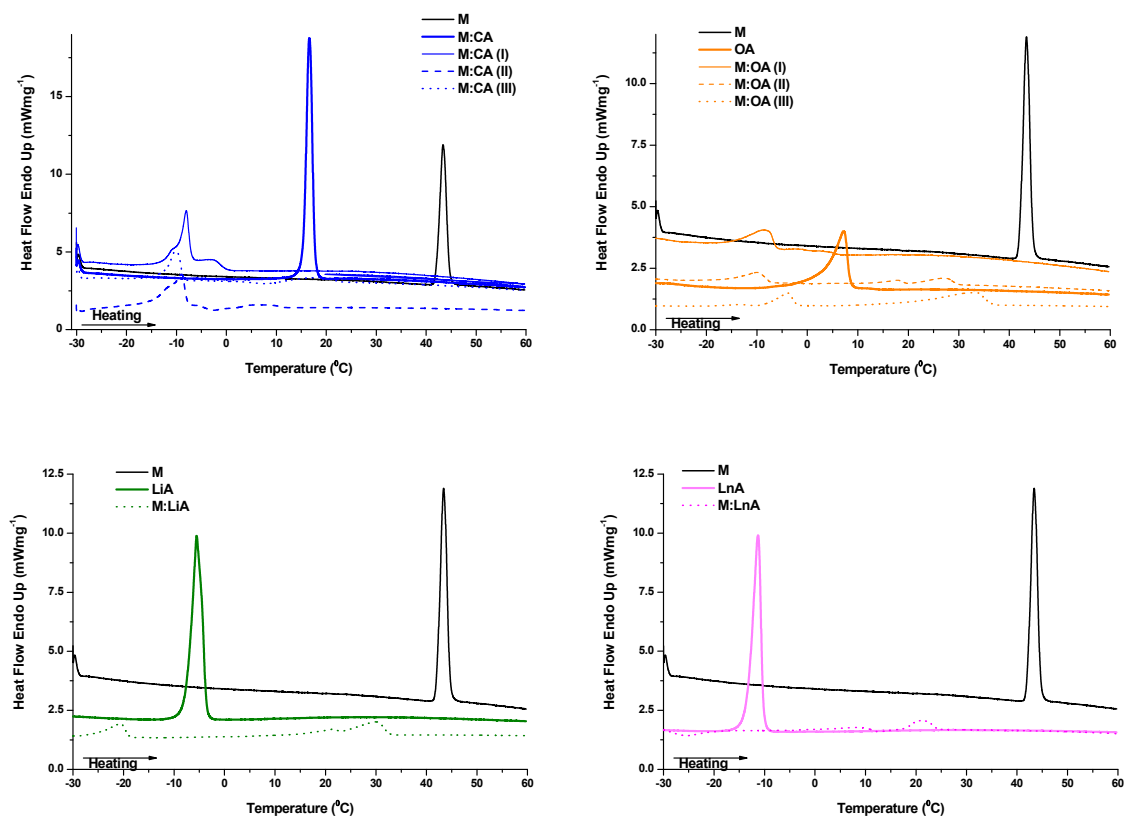

Figure S1. Comparative DSC scans obtained at heating rate 10 °C min<sup>-1</sup> of mixtures of L-menthol (M) and fatty acids (CA - C8:0, OA - C18:1, LiA - C18:2, and LnA - C18:3)

Table S1. Characterization of DES(s) using DSC analysis.

| Sample     | Ramp    | Process         | $T_i/^{\circ}\text{C}$ | $T_{\text{max}}/^{\circ}\text{C}$ | $T_f/^{\circ}\text{C}$ | $\Delta H/\text{J g}^{-1}$ |
|------------|---------|-----------------|------------------------|-----------------------------------|------------------------|----------------------------|
| L-menthol  | cooling | -               | -                      | -                                 | -                      | -                          |
|            | heating | melting         | 42.1                   | 43.4                              | 44.6                   | 87.7                       |
| CA         | cooling | crystallization | 6.3                    | 6.0                               | 5.3                    | -143.4                     |
|            | heating | melting         | 15.4                   | 16.6                              | 17.8                   | 144.1                      |
| M:CA (I)   | cooling | crystallization | -20.9                  | -23                               | -24.9                  | -84.3                      |
|            | heating | melting         | -9.9                   | -8.0                              | 6.7                    | 82.4                       |
| M:CA (II)  | cooling | -               | -                      | -                                 | -                      | -                          |
|            | heating | melting         | -13                    | -9.0                              | -7.7                   | 93.9                       |
|            |         |                 | 1.0                    | 5.7                               | 9.5                    | 14.1                       |
| M:CA (III) | cooling | crystallization | -3.0                   | -5.2                              | -9.5                   | -10.9                      |
|            | heating | melting         | -12.4                  | -10.1                             | -8.7                   | 34.7                       |
|            |         |                 | 9.3                    | 18.1                              | 22.6                   | 21.6                       |
| OA         | cooling | crystallization | -8.5                   | -10.0                             | -11.7                  | -68.3                      |
|            |         |                 | -34.2                  | -38.0                             | -42.0                  | -6.15                      |
|            | heating | melting         | -34.0                  | -27.7                             | -24.2                  | -1.2                       |
|            |         |                 | 3.2                    | 7.2                               | 8.5                    | 67.4                       |
| M:OA (I)   | cooling | crystallization | -28.3                  | -30.9                             | -33.4                  | -12.5                      |
|            | heating | melting         | -45.9                  | -44.3                             | -42.6                  | -12.8                      |
|            |         |                 | -12.7                  | -8.4                              | -6.3                   | 33.0                       |
| M:OA (II)  | cooling | crystallization | 7.7                    | 2.8                               | 0.4                    | -12.3                      |
|            |         |                 | -28.5                  | -31.7                             | -34.0                  | -4.7                       |
|            |         |                 | -36.6                  | -41.5                             | -44.6                  | -6.9                       |
|            | heating | melting         | -18.1                  | -10.0                             | -7.7                   | 12.6                       |
|            |         |                 | 4.1                    | 18.0                              | 19.4                   | 3.8                        |
|            |         |                 | 24.7                   | 27.3                              | 29.6                   | 8.1                        |
| M:OA (III) | cooling | crystallization | 16.9                   | 15.3                              | 13.5                   | -1.0                       |
|            |         |                 | 10.3                   | 8.6                               | 6.5                    | -1.3                       |
|            |         |                 | -20.2                  | -24.2                             | -29.5                  | -16.4                      |
|            | heating | melting         | -17.5                  | -13.4                             | -11.0                  | 1.3                        |
|            |         |                 | -8.1                   | -3.9                              | 2.2                    | 11.4                       |
|            |         |                 | 22.1                   | 33.2                              | 36.3                   | 37.9                       |
| LiA        | cooling | crystallization | -26.4                  | -27.2                             | -28.0                  | -111.8                     |
|            |         |                 | -62.2                  | -64.2                             | -66.8                  | -3.5                       |
|            | heating | melting         | -58.8                  | -56.5                             | 54.7                   | 4.8                        |
|            |         |                 | -7.4                   | -5.5                              | -36                    | 117.9                      |
| M:LiA      | cooling | crystallization | 10.1                   | 9.1                               | 7.6                    | -143.3                     |
|            |         |                 | -62.1                  | -63.6                             | -65.9                  | -27.02                     |
|            | heating | melting         | -25.6                  | -20.7                             | -18.9                  | 63.02                      |
|            |         |                 | 0                      | 29.9                              | 32.6                   | 118.9                      |
| LnA        | cooling | crystallization | -19.6                  | -21.1                             | -23.2                  | -102.0                     |
|            | heating | melting         | -13.4                  | -11.3                             | -10.3                  | 104.3                      |
| M:LnA      | cooling | -               | -                      | -                                 | -                      | -                          |
|            | heating | -               | -31.5                  | -25.8                             | -19.6                  | -37.1                      |
|            |         | melting         | 6.6                    | 8.6                               | 11.9                   | 8.8                        |
|            |         |                 | 17.7                   | 21.1                              | 24.3                   | 12.5                       |

Table S2. Comparative data of refractive indices ( $n_D$ ) at 25°C of pure compounds and DES mixtures.

| sample     | $n_D^{25} \pm SD$<br>(this work) | $n_D^{25}$<br>(literature)   |
|------------|----------------------------------|------------------------------|
| L-menthol  | –                                | 1.3284 [1]                   |
| CA         | 1.42603 $\pm$ 0.00016            | 1.4258 [2]                   |
| M:CA (I)   | 1.44344 $\pm$ 0.00012            | –                            |
| M:CA (II)  | 1.44887 $\pm$ 0.00023            | –                            |
| M:CA (III) | 1.4517 $\pm$ 0.00032             | –                            |
| OA         | 1.46195 $\pm$ 0.00011            | 1.4577 [3]                   |
| M:OA (I)   | 1.46114 $\pm$ 0.00030            | –                            |
| M:OA (II)  | 1.46043 $\pm$ 0.00035            | –                            |
| M:OA (III) | –                                | –                            |
| LiA        | 1.46803 $\pm$ 0.00027            | 1.468-1.472 [4]<br>1.478 [5] |
| M: LiA     | 1.46241 $\pm$ 0.00029            | –                            |
| LnA        | 1.47903 $\pm$ 0.00021            | 1.480 [6]                    |
| M: LnA     | 1.46322 $\pm$ 0.00022            | –                            |

\* SD-standard deviation of mean for triplicate consecutive measurements

Tabel S3. Testing the catalytic activity of the immobilized lipases (TE/RN/TL/NV) for the reaction of DES components - the determination of fatty acid conversion (%) based on the acylation of L-menthol with DES donor (CA, OA, LiA and LnA).DES . The control did not contain lipase. (Triplicate measurements of the samples with maximum 20 % RSD)

|     | TE  | RN  | TL  | NV  | control |
|-----|-----|-----|-----|-----|---------|
| CA  | 2.5 | 2.9 | 0.7 | 0.5 | -       |
| OA  | 1.4 | 0.1 | 0.8 | 0.2 | -       |
| LiA | 0.5 | 0.1 | 0.3 | 1.2 | -       |
| LnA | 0.3 | 0.1 | 0.5 | 0.8 | -       |

## Experimental procedure

### *FME synthesis*

The menthyl esters of fatty acids were synthesized adapting Neises's method (B. Neises, W. Steglich, Simple Method for the Esterification of Carboxylic Acids, *Angew. Chem.*, 17 (1978), 522-524). 0.01 mol of fatty acid and 0.001 mol of N, N-dimethylaminopyridine (DMAP) were dissolved in 25 mL of methylene chloride and then 0.01 mol of menthol were added. The solution was cooled to 0 °C followed by the addition of 0.01 mol of N,N-dicyclohexylcarbodiimide (DCC). The resulted mixture was stirred at 0 °C for 5 minutes and then at room temperature for 3h. Consequently, the formed precipitate was removed by the filtration and the supernatant was dried under reduced pressure (10 mmHg) leading to a residue. The residue was dissolved in a small amount of methylene chloride, and any additionally formed precipitate was removed through filtration. The solution was washed twice with 25 mL of hydrochloric acid 0.5 N and dried under reduced pressure. The crude product was purified by column chromatography on silica gel, elution was performed with EE/EP gradient mixtures, and collecting the fraction eluted with 1:9 ratio of solvents. Evaporation of the solvent gave an analytically pure compound (FME).

### *FME characterization*

The solid materials were characterized by FTIR spectroscopy with a Bruker VERTEX 70 instrument, equipped with a Harrick MVP2 diamond ATR device. Also, NMR spectra were recorded on a Bruker Advance III 600 MHz spectrometer, corresponding to the resonance frequency of 600.12 MHz for the  $^1\text{H}$  nucleus, equipped with an indirect detection for nuclei probe head (BBI) and field gradients on Z axis. Samples were analyzed in 5 mm NMR tubes (Willmad).

**Menthyl palmitate (2.03g, Rf=0.65)**  $^1\text{H}$ -NMR (600 MHz, Chloroform-*d*)  $\delta$  4.66 (td,  $J$  = 10.9, 4.4 Hz, 1H), 2.25 (td,  $J$  = 7.3, 1.4 Hz, 2H), 1.96 (dd,  $J$  = 12.0, 2.1 Hz, 1H), 1.85 (td,  $J$  = 7.0, 2.8 Hz, 1H), 1.70 – 1.62 (m, 2H), 1.62 – 1.53 (m, 2H), 1.52 – 1.42 (m, 1H), 1.39 – 1.32 (m, 1H), 1.31 – 1.20 (m, 24H), 1.11 – 1.00 (m, 1H), 0.97 – 0.89 (m, 1H), 0.90 – 0.78 (m, 10H), 0.74 (d,  $J$  = 7.0 Hz, 3H).  $^{13}\text{C}$ -NMR (151 MHz, Chloroform-*d*)  $\delta$  173.39, 73.81, 47.02, 40.95, 34.73, 34.28, 31.66, 31.35, 29.68, 29.57, 29.47, 29.41, 29.38, 29.35, 29.20, 29.07, 28.90, 26.22, 25.12, 24.70, 23.40, 22.56, 21.99, 20.72, 16.25, 14.02. FTIR: 2925, 2862, 1731, 1458, 1374, 1249, 1168, 1105, 981.

**Menthyl laurate (2.53g Rf=0.72)**  $^1\text{H}$ -NMR (600 MHz, Chloroform-*d*)  $\delta$  4.67 (td,  $J$  = 10.9, 4.4 Hz, 1H), 2.32 – 2.22 (m, 2H), 1.98 (dd,  $J$  = 12.1, 2.0 Hz, 1H), 1.86 (td,  $J$  = 7.0, 2.8 Hz, 1H),

1.67 (ddq,  $J = 13.3, 6.7, 3.2$  Hz, 2H), 1.63 – 1.57 (m, 2H), 1.48 (dtd,  $J = 12.0, 5.9, 3.1$  Hz, 1H), 1.40 – 1.33 (m, 1H), 1.27 (d,  $J = 22.7$  Hz, 16H), 1.05 (dd,  $J = 12.9, 3.5$  Hz, 1H), 0.95 (q,  $J = 11.8$  Hz, 1H), 0.91 – 0.82 (m, 10H), 0.75 (d,  $J = 7.0$  Hz, 3H).  $^{13}\text{C}$ -NMR (151 MHz, Chloroform-*d*)  $\delta$  173.47, 73.87, 47.05, 40.98, 34.78, 34.30, 31.91, 31.38, 29.61, 29.59, 29.49, 29.33, 29.27, 29.14, 26.26, 25.15, 23.44, 22.68, 22.02, 20.76, 16.29, 14.10. FTIR: 2923, 2859, 1732, 1458, 1374, 1245, 1177, 1107, 981.

**Menthyl oleate (2.55g, Rf=0.73)**  $^1\text{H}$ -NMR (600 MHz, Chloroform-*d*)  $\delta$  5.34 (qd,  $J = 3.8, 1.8$  Hz, 2H), 4.67 (td,  $J = 10.9, 4.4$  Hz, 1H), 2.27 (td,  $J = 7.3, 1.1$  Hz, 2H),  $\delta$  2.03 – 1.95 (m, 4H), 1.86 (td,  $J = 7.0, 2.8$  Hz, 1H), 1.67 (ddd,  $J = 13.6, 6.5, 2.9$  Hz, 2H), 1.63 – 1.58 (m, 2H), 1.48 (ddt,  $J = 8.7, 5.3, 2.8$  Hz, 1H), 1.34 (d,  $J = 2.9$  Hz, 2H), 1.33 – 1.24 (m, 20H), 1.05 (dd,  $J = 12.8, 3.4$  Hz, 1H), 0.98 – 0.91 (m, 1H), 0.91 – 0.86 (m, 10H), 0.75 (d,  $J = 7.0$  Hz, 3H).  $^{13}\text{C}$ -NMR (151 MHz, Chloroform-*d*)  $\delta$  173.43, 129.98, 129.75, 73.86, 47.03, 40.96, 34.75, 34.29, 31.90, 31.37, 29.76, 29.68, 29.52, 29.32, 29.31, 29.16, 29.12, 29.11, 27.21, 27.17, 26.24, 25.13, 23.42, 22.68, 22.02, 20.76, 16.28, 14.10. FTIR: 3005, 2954, 2923, 2854, 1732, 1457, 1370, 1243, 1176, 1097, 1011, 985.
